# Supplementary material for: An efficiency of 14.29% and 13.08% for 1 cm2 and 4 cm2 flexible organic solar cells enabled by sol–gel ZnO and ZnO nanoparticle bilayer electron transporting layers
Source: Royal Society of Chemistry journal article supplement (doi:10.1039/d1ta03308e), 2021-01-01
Supplement: d1ta03308e1.pdf [file d1ta03308e1.pdf]

## Supporting Information

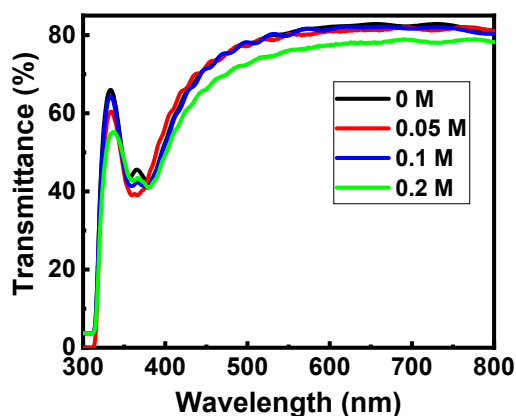

**Figure S1.** (a) The sheet resistance and  $T_{550}$  of PET/AgNWs/sol-gel ZnO films with different concentrations of sol-gel ZnO.

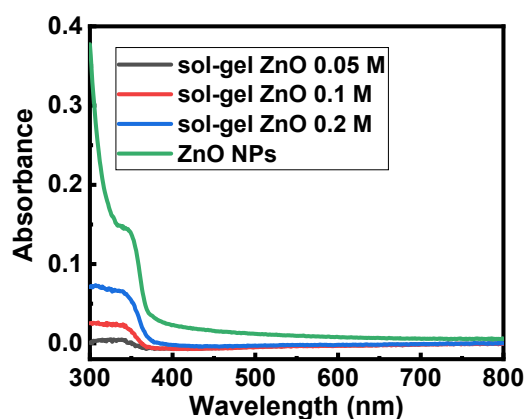

**Figure S2.** The UV-vis absorption spectra of the ZnO NPs and sol-gel ZnO films with different concentrations.

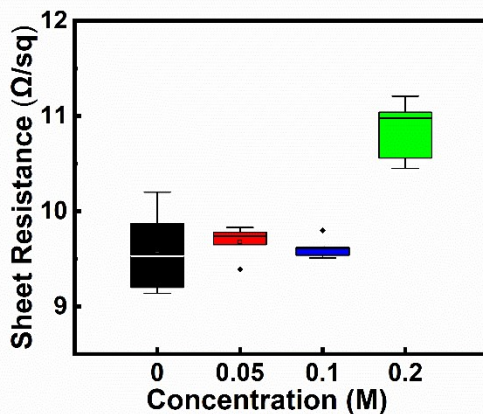

**Figure S3.** The sheet resistance of the AgNWs/sol-gel ZnO films.

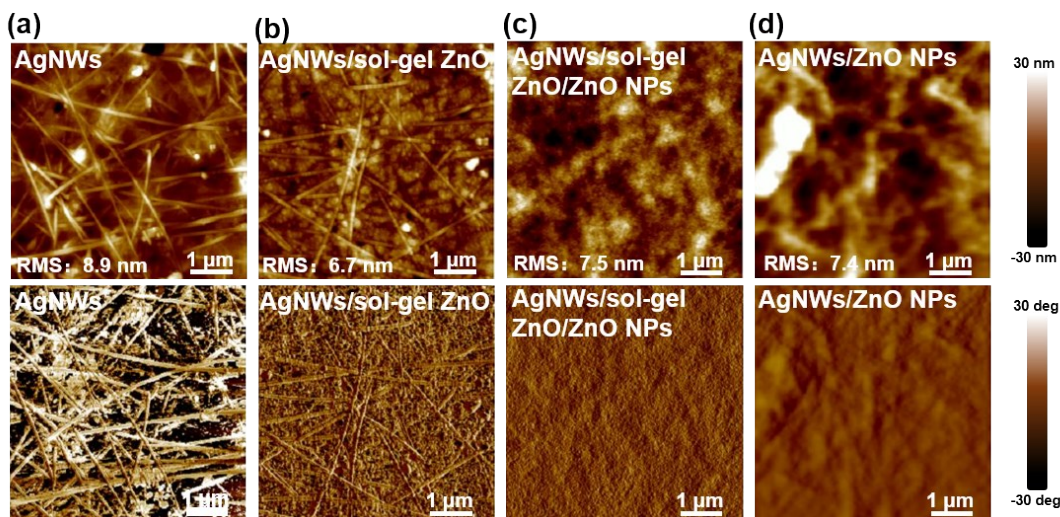

**Figure S4.** AFM images of (a) the Ag NWs, (b) Ag NWs/sol-gel ZnO, (c) Ag NWs/sol-gel ZnO/ZnO NPs, and (d) Ag NWs/ZnO NPs films.

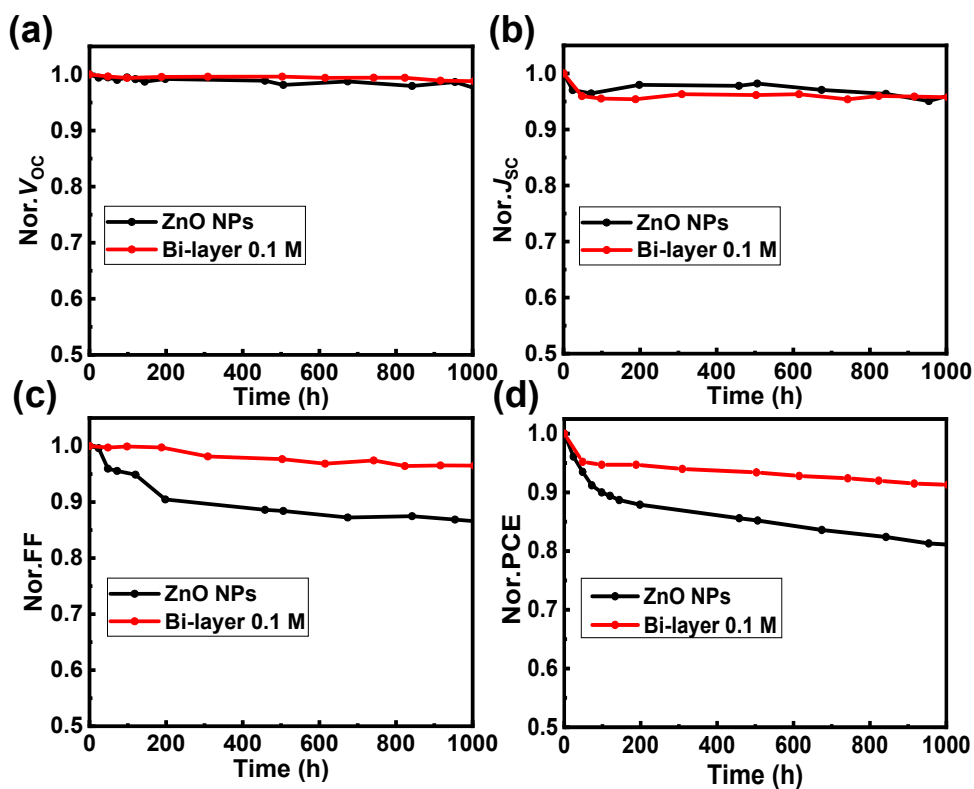

**Figure S5.** The evolution of normalized (a)  $V_{OC}$ , (b)  $J_{SC}$ , (c) FF, (d) PCE of the 1 cm<sup>2</sup> flexible devices.

**Table S1.** The calculated results of the resistor and capacitor from EIS.

| ETL            | $R_{sheet}$<br>( $\Omega$ ) | $R_{CT}$<br>( $\Omega$ ) | C<br>(F)              |
|----------------|-----------------------------|--------------------------|-----------------------|
| ZnO NPs        | 8.14                        | 690                      | $2.81 \times 10^{-6}$ |
| Bi-layer 0.1 M | 8.42                        | 84                       | $4.66 \times 10^{-8}$ |
